# Supplementary material for: Loss of the branched-chain amino acid transporter CD98hc alters the development of colonic macrophages in mice
Source: PubMed Central journal article supplement (PMC7080761; doi:10.1038/s42003-020-0842-3), 2020-03-18
Supplement: 42003_2020_842_MOESM1_ESM.pdf [file 42003_2020_842_MOESM1_ESM.pdf]

1 **Supplementary Information**

2 **Supplementary Figures**

3

4 **Supplementary Figure 1. Characterization of bone marrow and colonic lamina propria**  
5 **monocytes and macrophages.**

6 **(a)** Representative tSNE visualization of bone marrow cells displaying the indicated markers  
7 used for the identification of respective cell populations from one out of eight analyzed animals.

8 **(b)** Staining control for figure 1d. **(c)** Representative tSNE visualization of colonic lamina  
9 propria (cLP) showing the distribution of indicated markers used for the identification of  
10 respective cell populations in the colonic lamina propria from one animal out of eight analyzed  
11 mice.

12

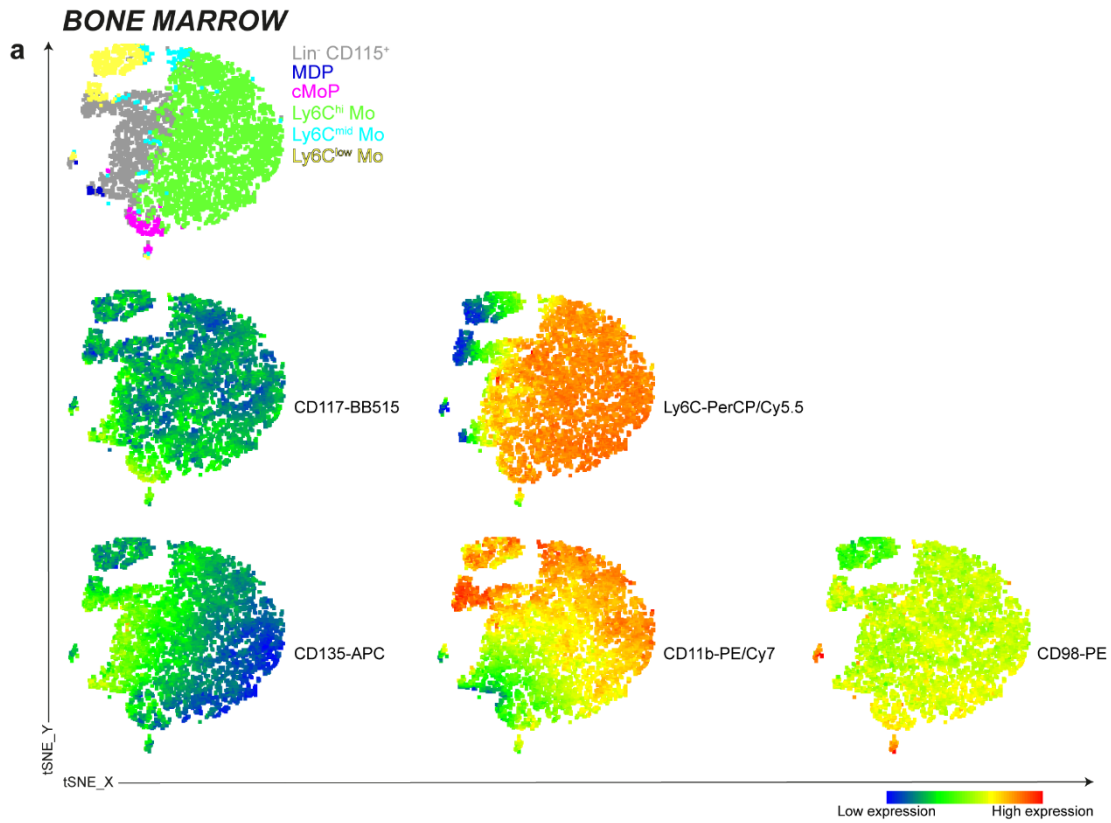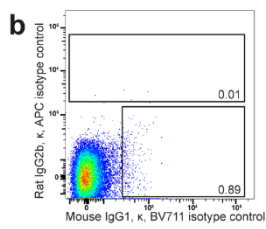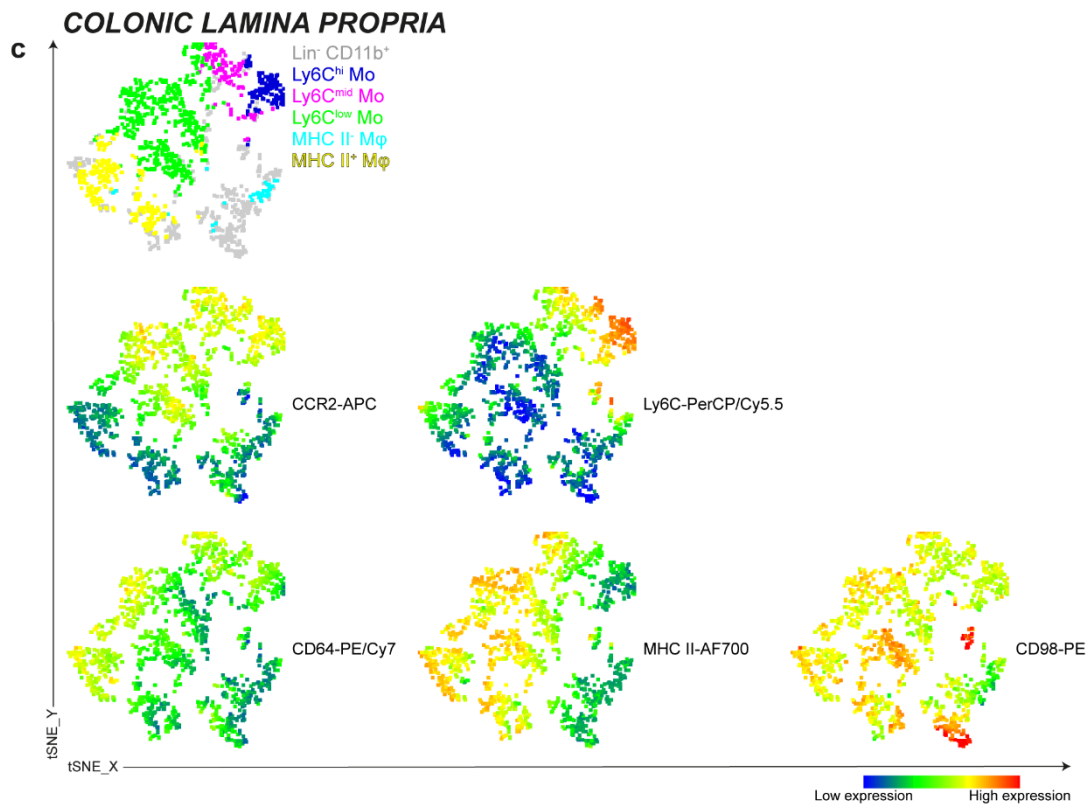

14 **Supplementary Figure 2. CD98hc is expressed in the small and large intestine.**

15 (a) The small intestine and the colon of naïve Cx3cr1-GFP mice were stained for CD98hc and  
16 counterstained with NucBlue. (b and c) Bone marrow derived macrophages (BMDM) were  
17 stimulated either with LPS + IFN- $\gamma$  or with IL-4 + IL-13 and surface CD98 expression assessed  
18 by flow cytometry. Histogram and mean fluorescence intensity (MFI) are shown. (d) Histogram  
19 and (e) MFI of yolk sac macrophages from embryos (E8.5), CD11c<sup>-</sup> and CD11c<sup>+</sup> liver myeloid  
20 cells and Langerhans cells isolated from naïve adult mice and stained for CD98. Red histograms  
21 show FMO control, blue histograms cells stained for CD98. Number within plots indicated the  
22 percentage of CD98<sup>+</sup> macrophages, liver myeloid cells and Langerhans cells. (f) Gating strategy  
23 for the identification of the yolk sac macrophages, CD11c<sup>-</sup> and CD11c<sup>+</sup> liver myeloid cells and  
24 Langerhans cells. Statistical significance was calculated with a Kruskal-Wallis test followed by  
25 Dunn's correction; \*p<0.05, \*\*p<0.01. Experiments performed thrice for the CD98hc staining,  
26 thrice for the CD98hc expression in fetus and Langerhans cells, and seven times for liver  
27 myeloid cells.

28

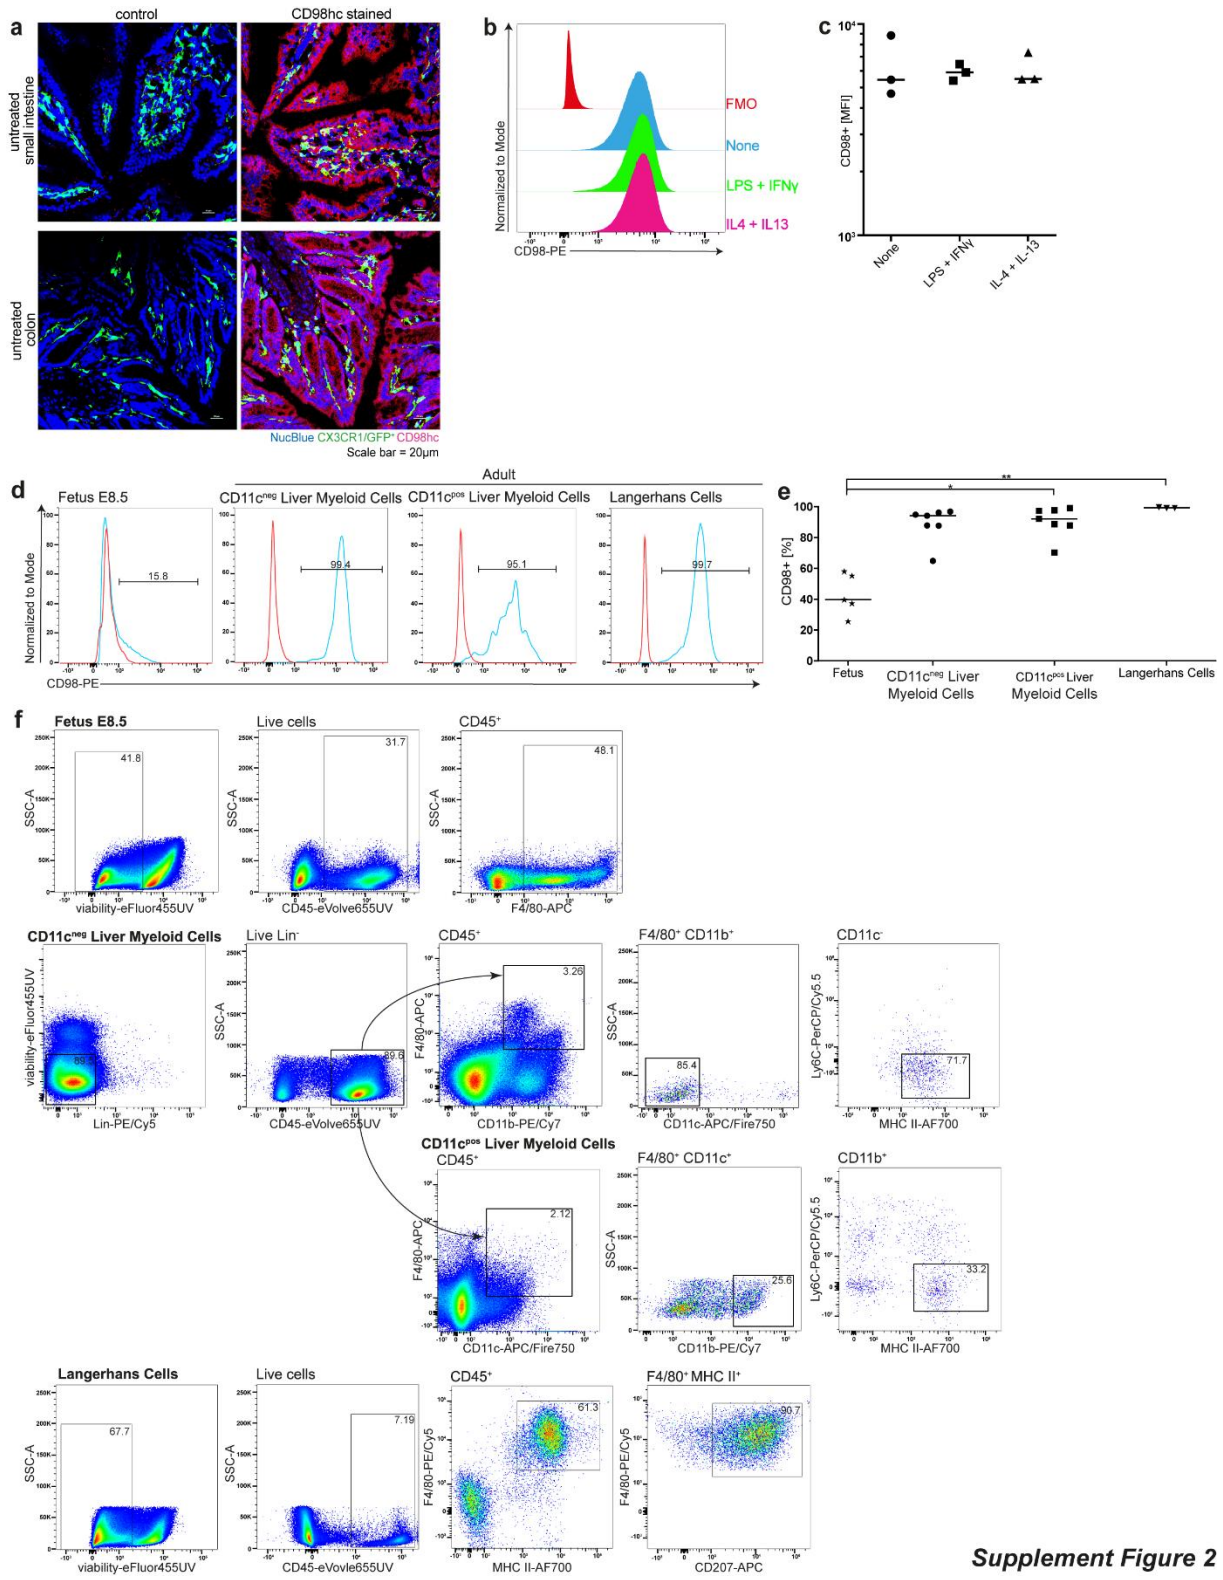

Supplement Figure 2

29

30

31

32

33 **Supplementary Figure 3. Tamoxifen induced Cre recombinase deletes CD98hc in**  
34 **monocytes and macrophages but not in T cells in CD98hc<sup>ΔCX3CR1</sup> animals.**

35 (a) CD98hc<sup>flox/flox</sup> mouse construct that were breed with Cx3cr1<sup>CreER</sup> mice. (b) Genotyping of,  
36 CD98hc<sup>flox/flox</sup>, CD98hc<sup>ΔCX3CR1</sup> and wildtype (WT) animals. (c) Percentage of CD98 expression  
37 by B cells, CD4<sup>+</sup> and CD8<sup>+</sup> T cells, dendritic cells (DC), macrophages, neutrophils isolated  
38 from the colonic lamina propria of corn oil- or tamoxifen-treated C57BL/6 WT or  
39 CD98hc<sup>ΔCX3CR1</sup> animals. (d) Gating strategy for the identification of B cells, CD4<sup>+</sup> and CD8<sup>+</sup> T  
40 cells, dendritic cells (DC), macrophages, neutrophils isolated from the colonic lamina propria.  
41 (e) Percentage of integrin β1/CD29<sup>+</sup> monocytes and macrophages in indicated animals treated  
42 with corn oil or tamoxifen. Data was analyzed by two-way ANOVA followed by Sidak's  
43 correction; \*p<0.05, \*\*\*\*p<0.0001. Experiments performed twice.

44

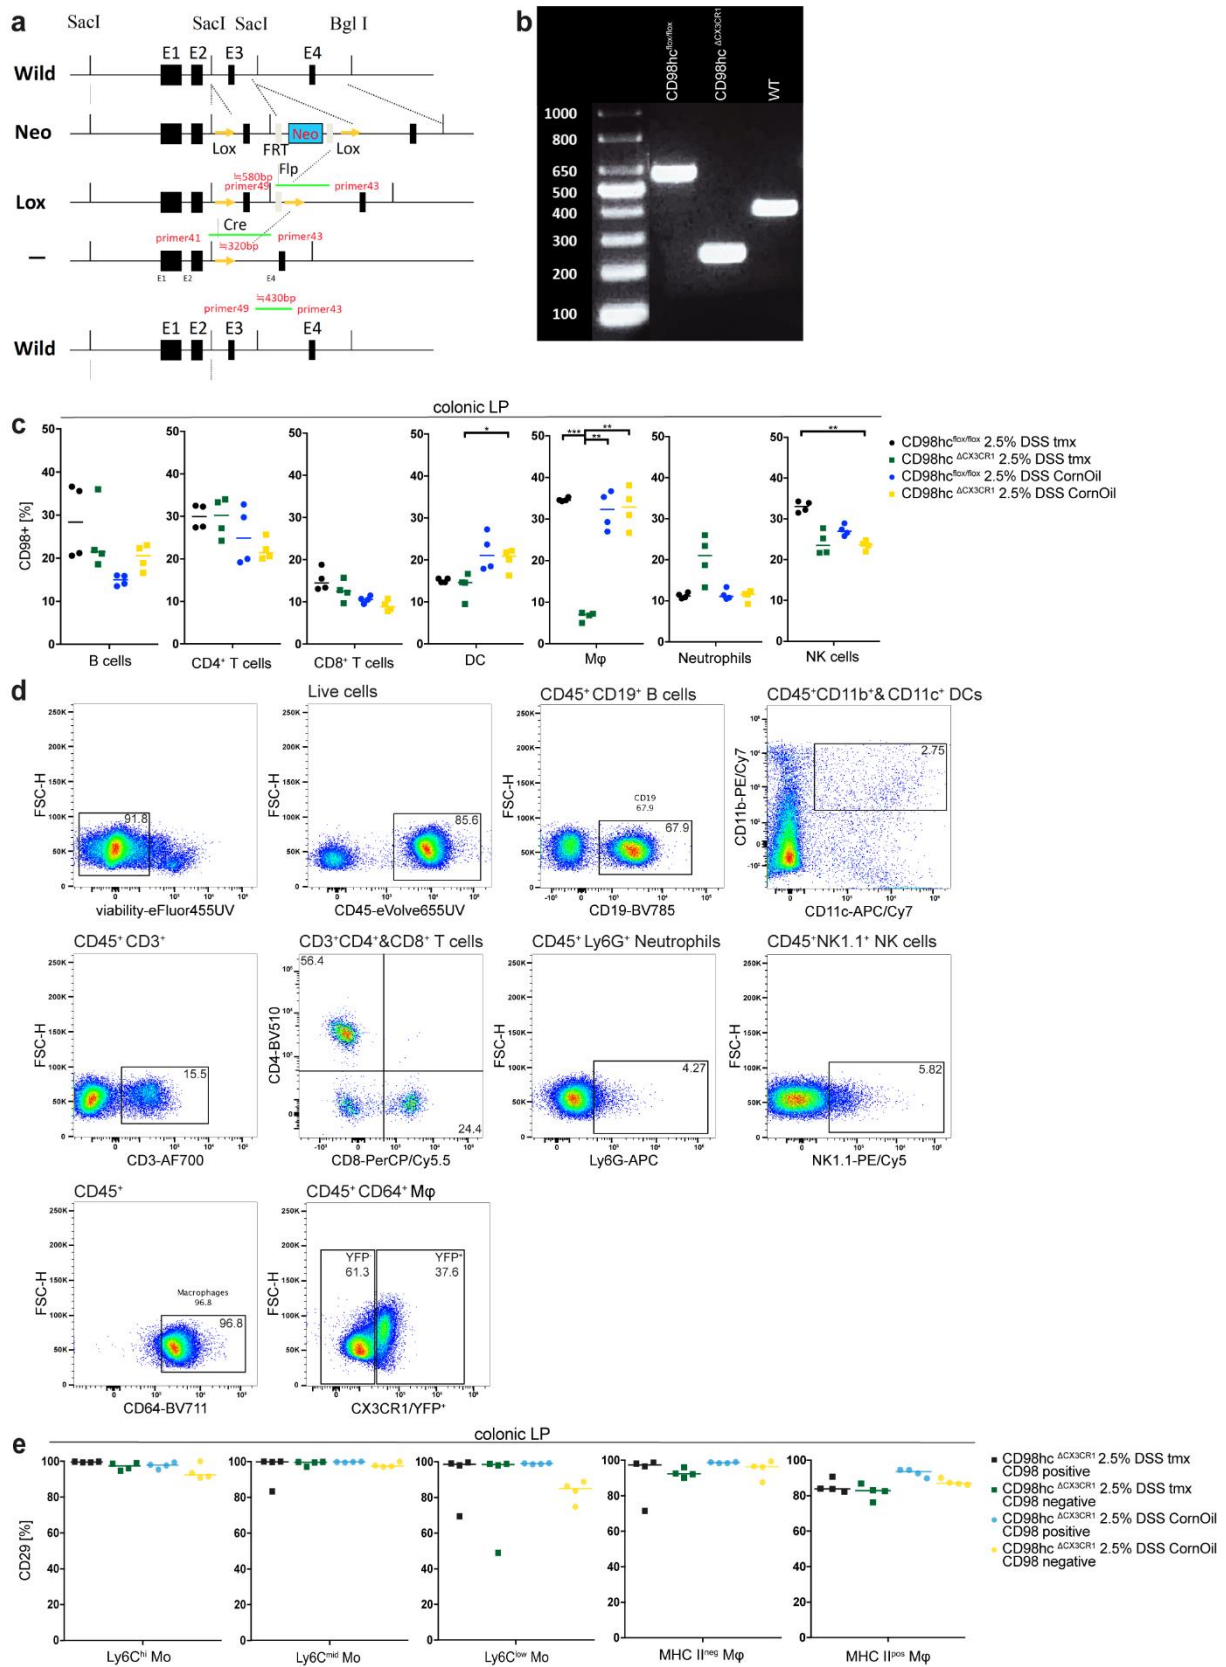

Supplement Figure 3

45

46

47

48 **Supplementary Figure 4. CD98hc deletion in cardiac macrophages but not in microglia.**

49 (a) Gating strategy for the identification of microglia and cardiac macrophages obtained after  
 50 exclusion of dead cells. Red histograms show FMO control, blue histograms present cells  
 51 stained for CD98hc. Circulating cell of hematopoietic origin were excluded after i.v. injection  
 52 of an anti-CD45 SuperBright antibody into the animals at least 5 min before isolation. (b)  
 53 Absolute cell numbers of microglia and cardiac macrophages and percentage of CD98hc  
 54 expressing macroglia and cardiac macrophages after intraperitoneal corn oil or tamoxifen  
 55 injection in CD98hc<sup>ΔCX3CR1</sup> mice (n=3) and analyzed by two-way ANOVA followed by Sidak's  
 56 correction; \*p<0.05. Experiments performed once with three biological replicates.

57

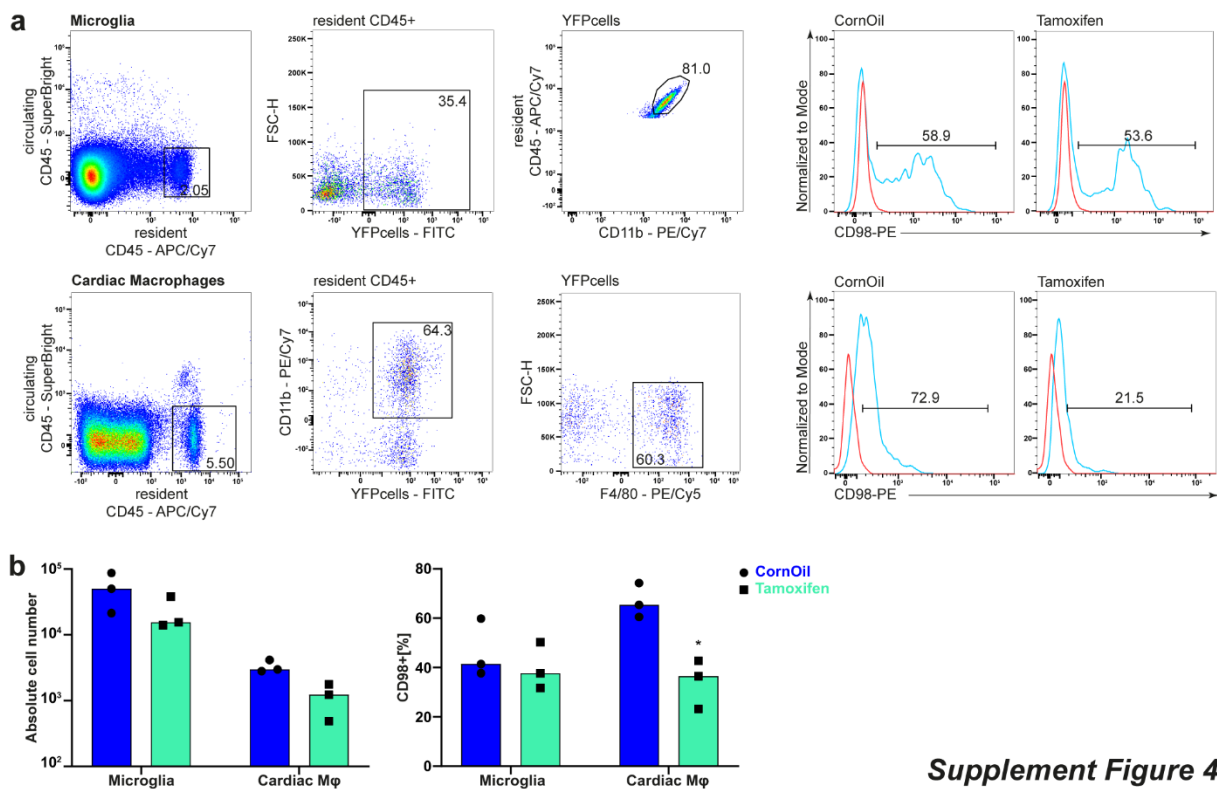

Supplement Figure 4

58

59

60

61

62

63

64 **Supplementary Figure 5. Animals fed with regular chow or L-leucin/L-isoleucine**  
65 **enriched chow before and after the deletion of CD98hc during DSS-induced colitis.**

66 Colitis was induced by adding 2.5% dextran sodium sulfate (DSS) to CD98hc<sup>flox/flox</sup> and  
67 CD98hc<sup>ΔCX3CR1</sup> mice which were treated either with corn oil or tamoxifen two days before DSS  
68 administration and fed with either regular chow or regular chow enriched with 5% L-leucine  
69 and 5% L-isoleucine. **(a)** Disease activity index, colon length, and histological scores of  
70 indicated groups. The data were analyzed by two-way ANOVA followed by Sidak's correction;  
71 \*\*\*\*p<0.0001. Histological scores were assessed in a blinded fashion by two independent  
72 investigators. The mean histological score was determined for each animal after H&E staining  
73 of colonic tissues, presented as individual dot and analyzed with a Mann-Whitney U test;  
74 \*p<0.05. The colon length was determined at day 7 after start of DSS administration, colon  
75 length is shown for each individual animal, the mean indicated and analyzed with a Mann-  
76 Whitney U test; \*p<0.05. **(b)** A representative image of the colon from each group is shown.  
77 **(c)** H&E staining of colonic tissues. **(d)** A representative image of the colonic CX3CR1/YFP<sup>+</sup>  
78 cells counterstained with NucBlue. **(e)** Quantification of the colonic CX3CR1/YFP<sup>+</sup> cells per  
79 high power field (HPF) per mouse. The Experiment was performed once.

80



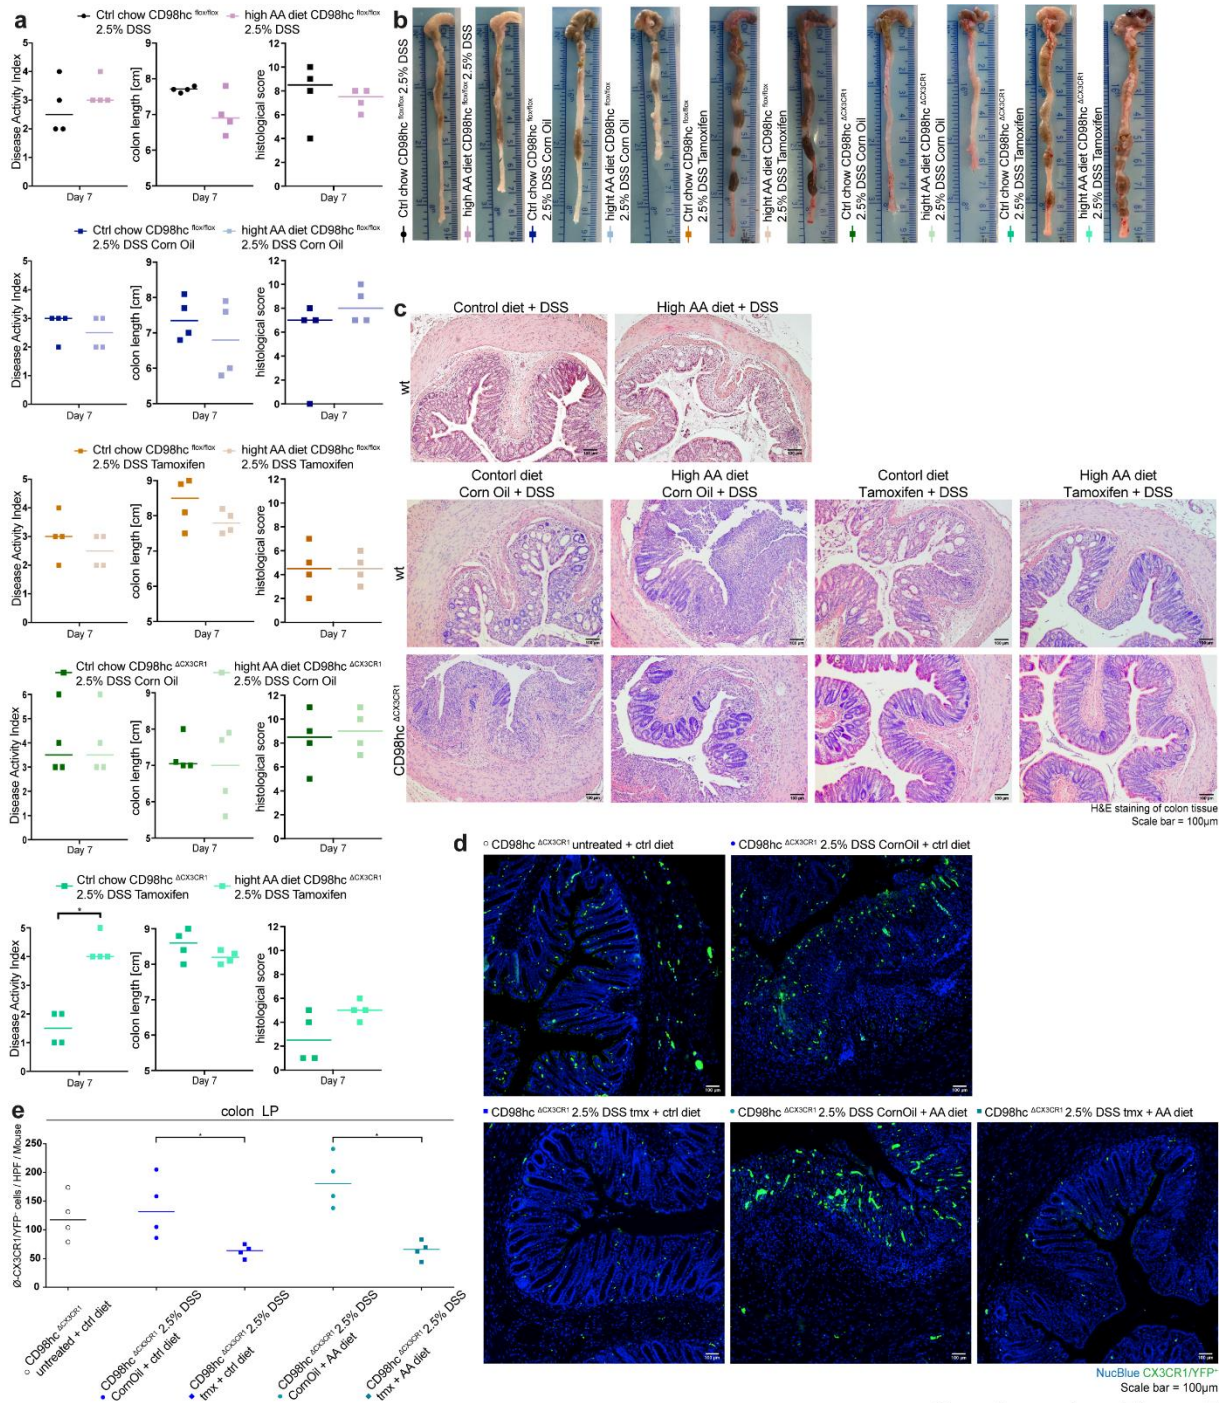

Supplementary Figure 5

81  
82  
83  
84  
85  
86  
87

88 **Supplementary Figure 6. mTORC1 pathway is not influenced by CD98hc deletion.**

89 (a) Colitis was induced by adding 2.5% dextran sodium sulfate (DSS) to CD98hc<sup>fllox/fllox</sup> and  
 90 CD98hc<sup>ΔCX3CR1</sup> mice which were treated either with corn oil or tamoxifen two days before DSS  
 91 administration. Histogram of the phosphorylation of p70S6K. Numbers indicate the percentage  
 92 of positive cells. (b) Percentage of phosphorylated p70S6K and S6 in bone marrow derived  
 93 macrophages (BMDM), which were cultured in RPMI 1640 medium containing essential amino  
 94 acids (EAA), EAA and either LPS + IFN $\gamma$  or IL-4 + IL-13 stimulation, non-essential amino  
 95 acid (NEAA) medium, and NEAA supplemented with L-leucine (0.05 g/L). (c) Changes in  
 96 normalized p70S6K and S6 phosphorylation in BMDM. (d) qRT-PCR of indicates cytokines,  
 97 *iNos*, *Mcp1* and *Kc* of BMDM cultured in EAA, EAA and LPS + IFN $\gamma$  stimulated, NEAA, and  
 98 NEAA supplemented with L-leucine (0.05 g/L). Experiment performed with three biological  
 99 replicates or in duplicates, respectively.

100

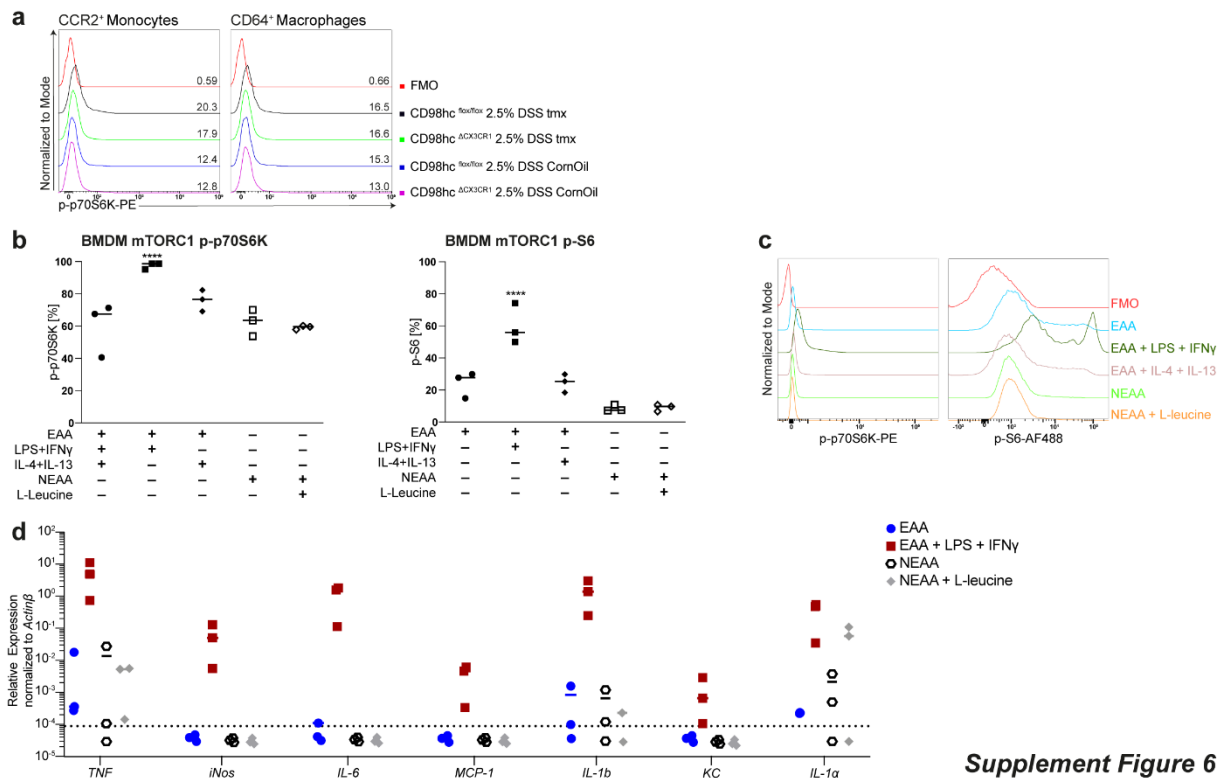

101

102

103

**Supplement Figure 6**

104 **Supplementary Figure 7. Verification of relevant patterns observed in the scRNA-seq**  
105 **data.**

106 (a) tSNE plots of control (corn oil-treated CD98hc<sup>ΔCX3CR1</sup> mice) and CD98hc cKO (tamoxifen-  
107 treated CD98hc<sup>ΔCX3CR1</sup> mice) and control and CD98hc cKO tSNE plots, where the individual  
108 samples per condition have been annotated. (b) Heatmap of cluster specific genes by cells from  
109 corn oil (control) and tamoxifen (cKO) treated animals. The clusters are shown in different  
110 colors. Heatmaps are showing the centered and scaled average expression (normalized log-  
111 counts values) across cells of each cluster in each condition. The experiment was performed  
112 once (scRNA-seq) with four biological replicates per group.

113

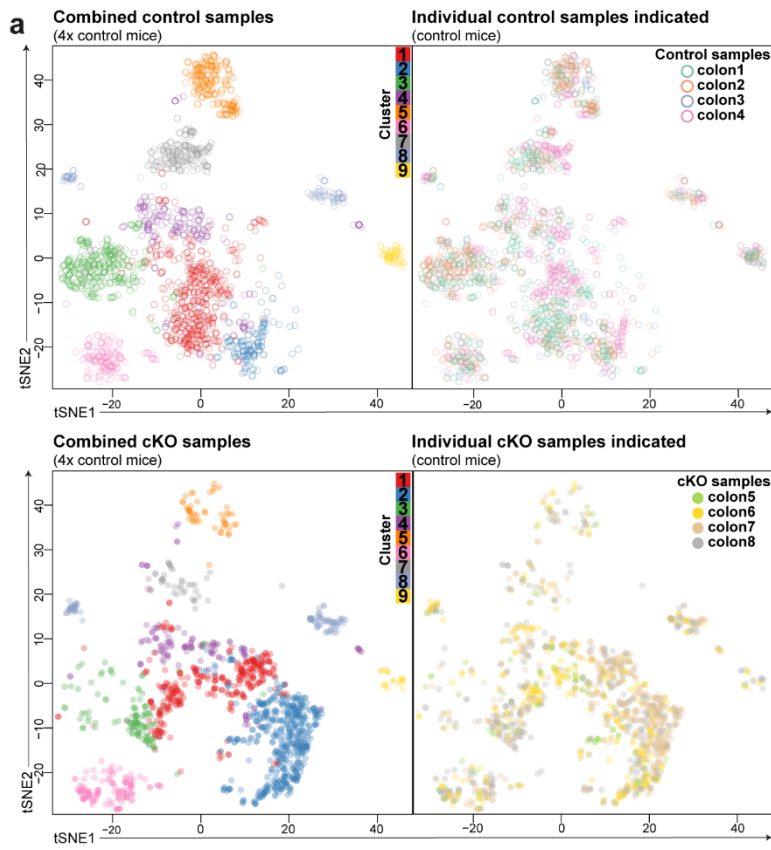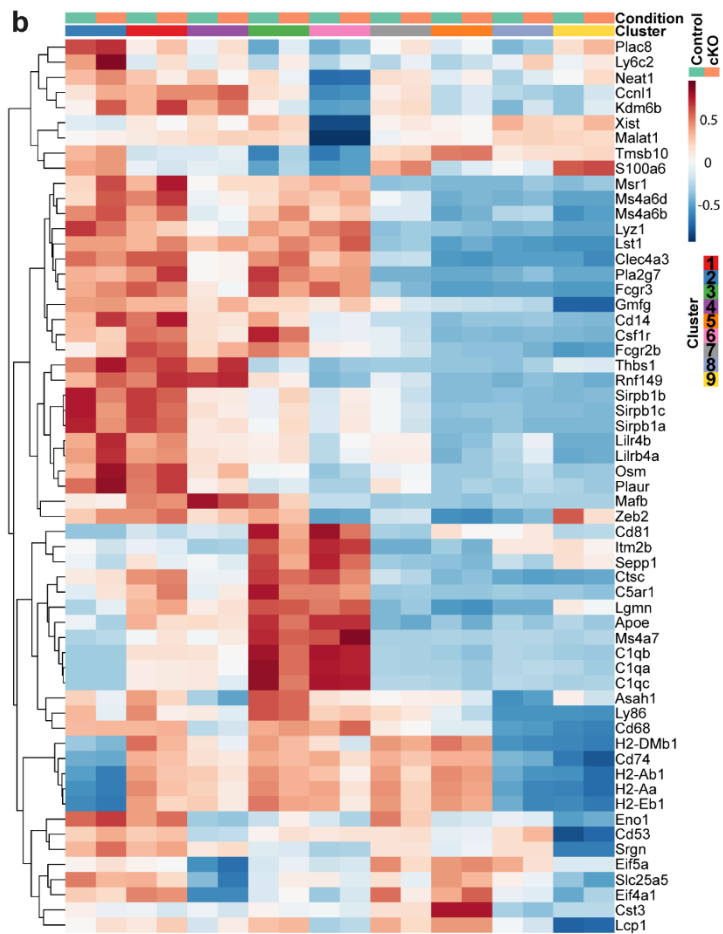

115 **Supplementary Figure 8. tSNE visualization of the expression of arbitrarily chosen**  
116 **markers.**

117 The experiment was performed once (scRNA-seq) with four biological replicates per group.

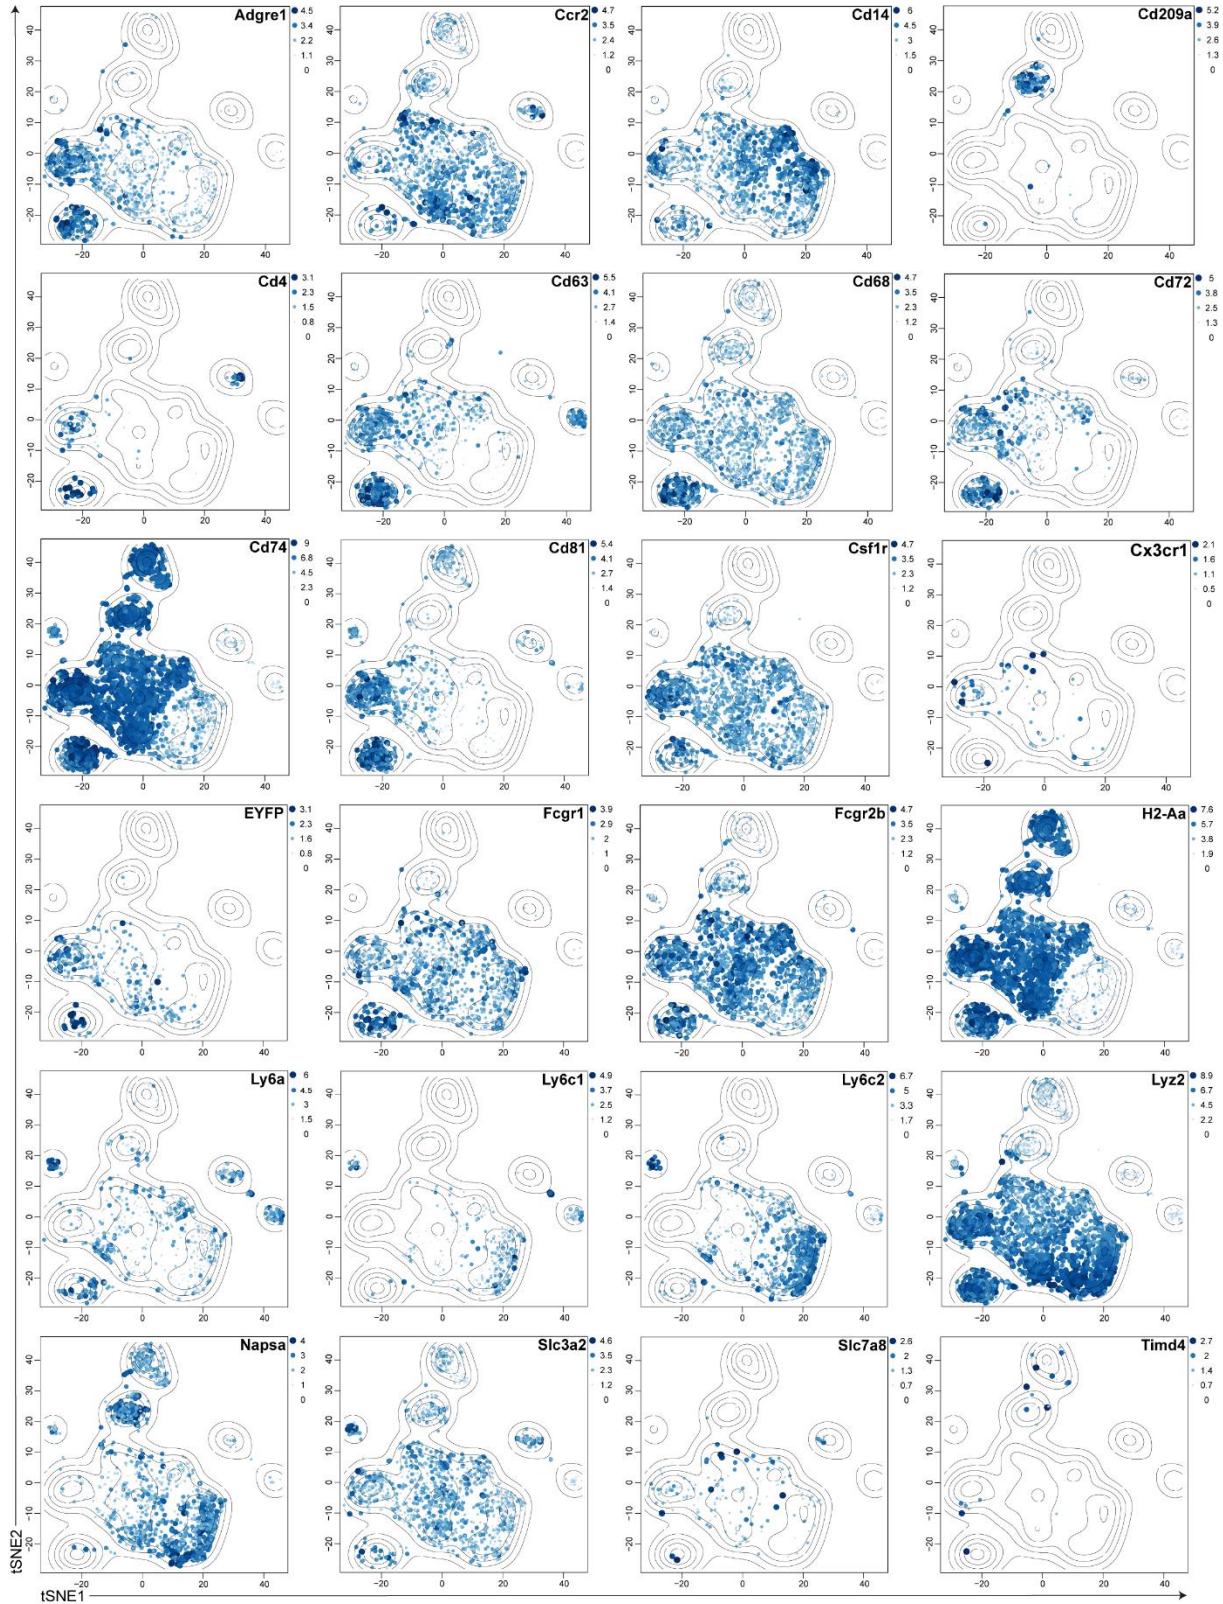

118

**Supplement Figure 8**

119

120 **Supplementary Figure 9. Chosen marker expression by flow cytometry.**

121 (a) Percentage of CD14<sup>+</sup>, CD81<sup>+</sup>, and CD72<sup>+</sup> colonic lamina propria monocytes and  
122 macrophages as determined by flow cytometry. Each dot represents an individual animal and  
123 the median value is shown. Data was analyzed by two-way ANOVA followed by Sidak's  
124 correction; \*\*\*p<0.001, \*\*\*\*p<0.0001. (b) Histogram plot of monocytes and macrophages  
125 after CD14, CD81, and CD72 staining. Red line represents the FMO control and blue line shows  
126 stained cells. Numbers in histograms indicate the percentage of CD14<sup>+</sup>, CD81<sup>+</sup>, and CD72<sup>+</sup>  
127 monocytes and macrophages. (c) Relative frequency of control and cKO cells within the  
128 different clusters defined based on the scRNA-seq experiment. Experiments performed once  
129 with three to four biological replicates per group.

130

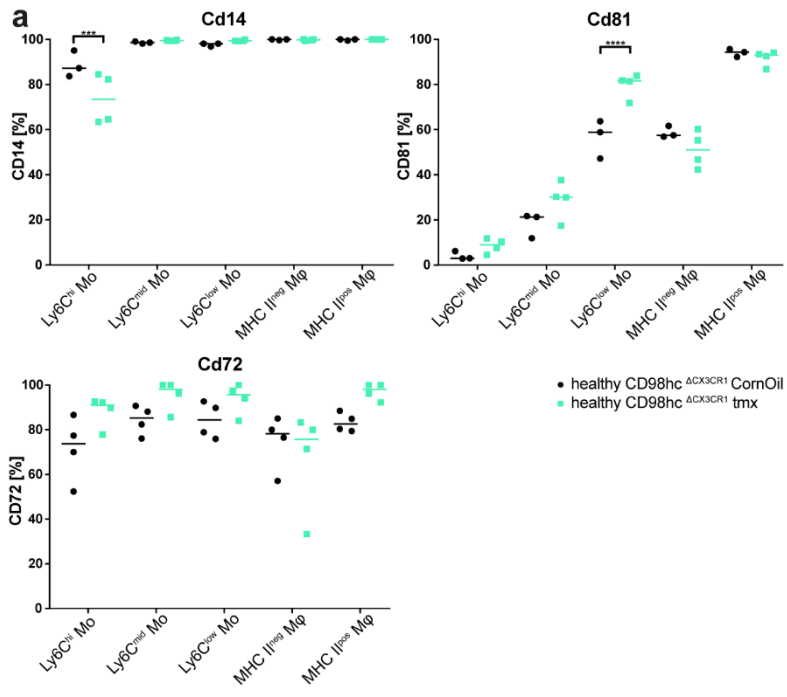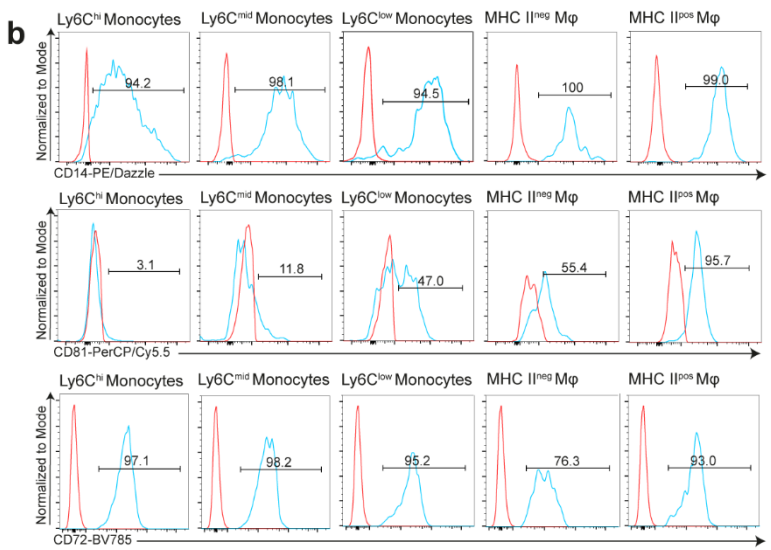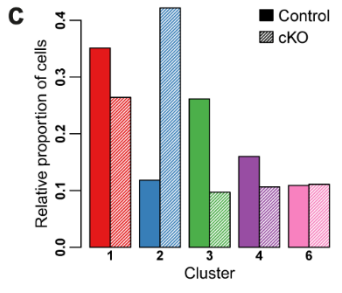

Supplement Figure 9

131  
132  
133  
134  
135

136 **Supplementary Figure 10. Deletion of CD98hc leads to increased apoptosis and reduced**  
137 **cell number in colonic macrophages.**

138 **(a)** Percentage of apoptotic cells determined by flow cytometry after Annexin V/viability  
139 staining by indicated monocytes and macrophages isolated from corn oil- or tamoxifen treated  
140 CD98hc<sup>flox/flox</sup> or CD98hc<sup>ΔCX3CR1</sup> animals. **(b)** Annexin V/viability staining of indicated  
141 experimental groups are presented by dot plot graphs. Data is shown as the mean and analyzed  
142 by two-way ANOVA followed by Sidak's correction; \*\*\*p<0.001, \*\*\*\*p<0.0001. The  
143 experiment was performed once.

144



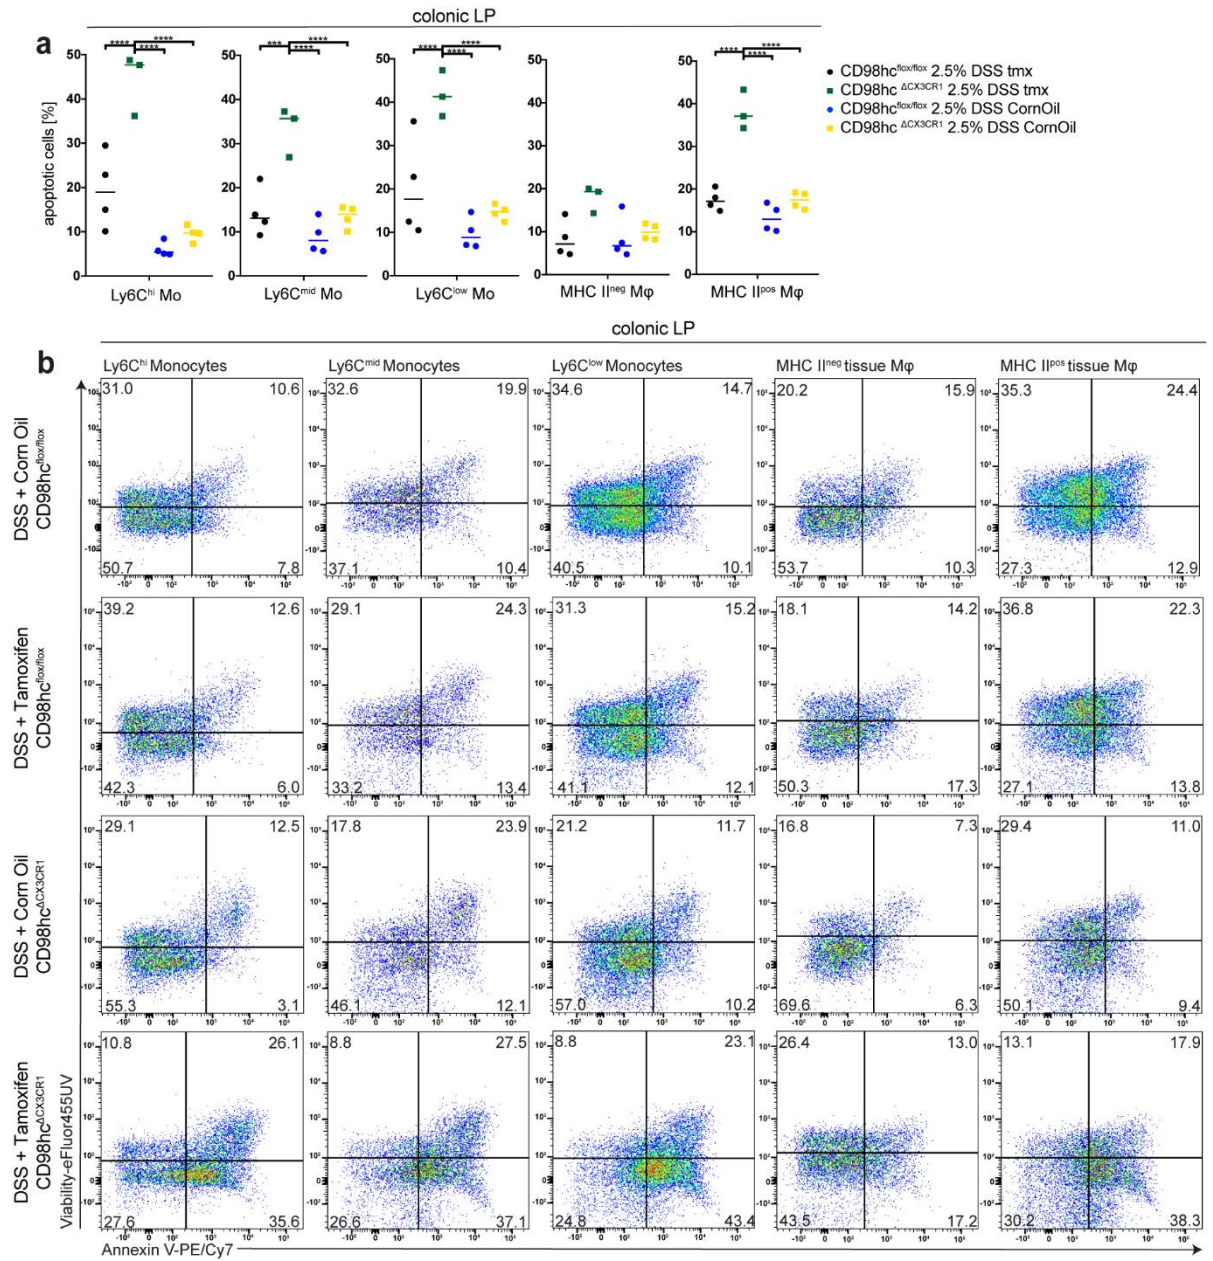

**Supplement Figure 10**

145

146

147

148

149

150

151

152

153

154 **Supplementary Figure 11. *In vitro* deletion of CD98hc results in BMDM cell death.**

155 Non-stimulated, LPS + IFN $\gamma$ , or IL-4 + IL-13 stimulated bone marrow-derived macrophages  
156 (BMDM) were cultured in RPMI 1640 medium containing: none (control), 100  $\mu$ g dimethyl  
157 sulfoxide (DMSO control), 2.5  $\mu$ g, 5  $\mu$ g, and 10  $\mu$ g tamoxifen dissolved in DMSO. Annexin  
158 V/viability and CD98 staining were performed and analyzed by flow cytometry to assess dead  
159 or apoptotic cells along with CD98 expression. The experiment was performed thrice.

160

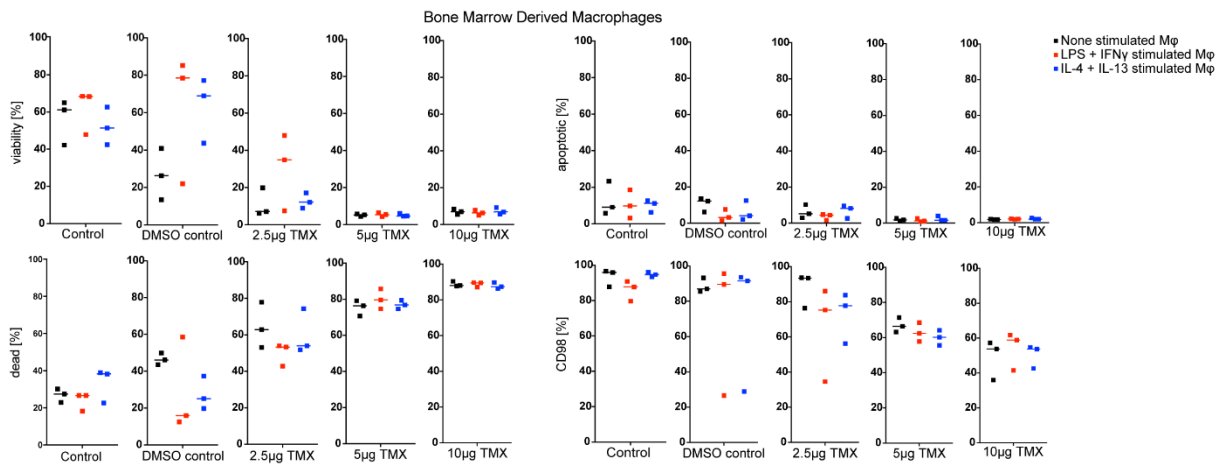

Supplement Figure 11

161

162

163

164

165

166

167

168

169

170

171

172

173 **Supplementary Figure 12.**

174 Schematic representation of the ‘monocyte waterfall’-development to gut macrophages in

175 C57BL/6 WT and CD98hc deficient mice.

176

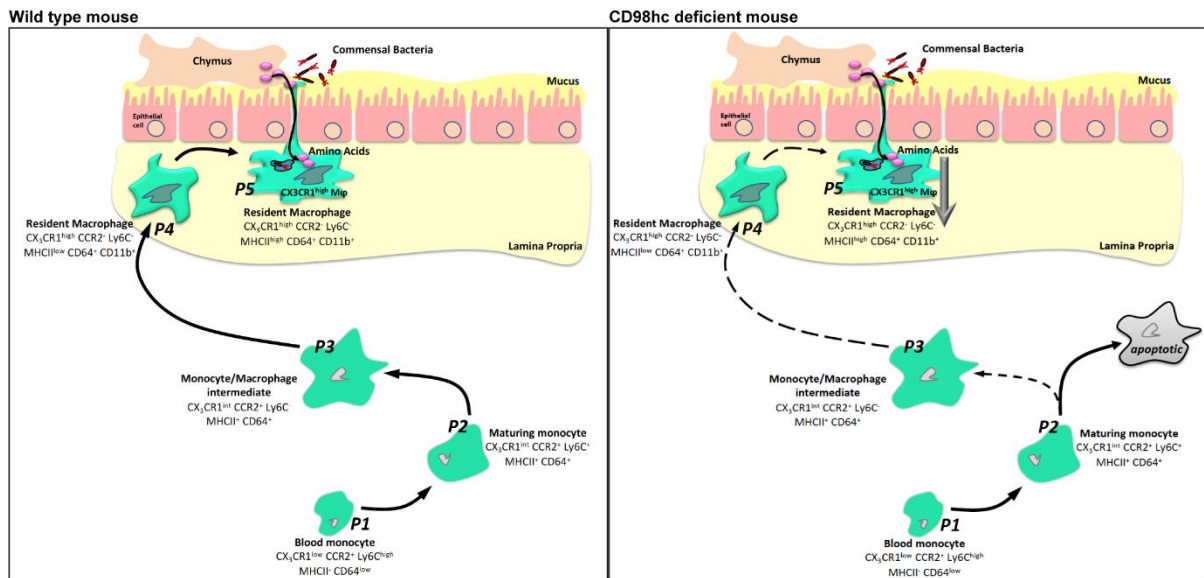

Supplement Figure 12

177

178 **Supplementary Tables**

179

180 **Supplementary Table 1.**

181 Depicted 10× genomics web summaries.

| <b>Treatment</b> | <b>CD98hc<sup>ACX3CR1</sup><br/>Colon #</b> | <b>Estimated Number of Cells</b> | <b>Mean Reads per Cell</b> | <b>Median Genes per Cell</b> |
|------------------|---------------------------------------------|----------------------------------|----------------------------|------------------------------|
| Corn Oil         | 1                                           | 696                              | 63.153                     | 1.657                        |
|                  | 2                                           | 495                              | 74.116                     | 1.794                        |
|                  | 3                                           | 94                               | 320.447                    | 1.630                        |
|                  | 4                                           | 536                              | 53.893                     | 1.666                        |
| Tamoxifen        | 5                                           | 95                               | 455.324                    | 1.476                        |
|                  | 6                                           | 387                              | 103.541                    | 1.378                        |
|                  | 7                                           | 506                              | 65.280                     | 1.680                        |
|                  | 8                                           | 435                              | 97.441                     | 1.614                        |

182

183

184

185

186

187

188

189

190

191

192

193

194

195

196

197

198

199 **Supplementary Table 2.**

200 Annotated cell types per cluster.

| Source Name | Cell Type                                                   |
|-------------|-------------------------------------------------------------|
| Cluster 1   | Monocytes, Macrophages                                      |
| Cluster 2   | Monocytes                                                   |
| Cluster 3   | Macrophages                                                 |
| Cluster 4   | Monocytes, Macrophages, Endothelial cells, Epithelial cells |
| Cluster 5   | Dendritic cells                                             |
| Cluster 6   | Macrophages                                                 |
| Cluster 7   | Monocytes, Macrophages, Dendritic cells                     |
| Cluster 8   | B cells, Innate lymphoid cells (ILC), T cells               |
| Cluster 9   | Fibroblast, Stromal cells                                   |

201

202

203

204

205

206

207

208

209

210

211

212

213

214

215

216

217

218

219 **Supplementary Table 3.**

220 Characteristics of healthy patients and patients with Crohn's disease (CD) or ulcerative colitis  
 221 (UC), who provided biopsies to the Swiss IBD cohort used for *CD98hc/SLC3A2* and  
 222 *CD98lc/SLC7A5* expression analysis.

| Baseline Group characteristics      |                    |                                         |                    |                           |                    |
|-------------------------------------|--------------------|-----------------------------------------|--------------------|---------------------------|--------------------|
|                                     | <i>Healthy</i>     | <i>Crohn' disease</i>                   |                    | <i>Ulcerative colitis</i> |                    |
|                                     | n=7                | Quiescent (n=20)                        | Active (n=11)      | Quiescent (n=20)          | Active (n=11)      |
| Gender, male/female, n (%)          | 71/29%<br>5 m, 2 f | 60/40 %<br>12 m, 8 f                    | 36/64%<br>4 m, 7 f | 35/65%<br>12 m, 8 f       | 54/45%<br>6 m, 5 f |
| Median age (range), yr              | 42 (18-52)         | 56 (32-81)                              | 39 (31-71)         | 58 (31-81)                | 53 (24-68)         |
| Mean BMI (SD), kg/m <sup>2</sup>    | 23,6 (2,57)        | 24.15 (3)                               | 25.55 (4.9)        | 24.70 (2.99)              | 23.89 (4.08)       |
| Median age at diagnosis (range), yr | –                  | 33.5 (18-60)                            | 21 (14-34)         | 28.5 (14-65)              | 30 (16-60)         |
| Median disease duration (range), yr | –                  | 21.5 (6-45)                             | 19 (7-37)          | 26 (8-44)                 | 16 (7-38)          |
|                                     | <i>Healthy</i>     | <b>CD extent, n (%)</b>                 |                    |                           |                    |
| Ileum isolated                      | –                  | 5 (25%)                                 | 2 (18%)            | –                         | –                  |
| Colon isolated                      | 1 (14%)            | 2 (10%)                                 | 3 (27%)            | –                         | –                  |
| Ileocolonic                         | 1 (14%)            | 2 (10%)                                 | 5 (46%)            | –                         | –                  |
| unknown                             | –                  | 11 (55%)                                | 1 (9%)             | –                         | –                  |
| Colon ascending                     | 2 (29%)            | –                                       | –                  | –                         | –                  |
| Sigmoid                             | 1 (14%)            | –                                       | –                  | –                         | –                  |
| random                              | 2 (29%)            | –                                       | –                  | –                         | –                  |
|                                     | <i>Healthy</i>     | <b>UC extent, n (%)</b>                 |                    |                           |                    |
| Proctitis                           | –                  | –                                       | –                  | 1 (5%)                    | 1 (10%)            |
| Left-sided colitis                  | –                  | –                                       | –                  | 3 (20%)                   | 5 (45%)            |
| Pancolitis                          | –                  | –                                       | –                  | 5 (25%)                   | 5 (45%)            |
| Unknown                             | –                  | –                                       | –                  | –                         | –                  |
|                                     | <i>Healthy</i>     | <b>Current medical treatment, n (%)</b> |                    |                           |                    |
| No treatment                        | –                  | 5 (25%)                                 | –                  | 5 (25%)                   | 1 (9%)             |
| 5-ASA                               | –                  | 6 (30%)                                 | –                  | 13 (65%)                  | 9 (81%)            |
| Steroids                            | –                  | –                                       | 6 (54%)            | –                         | 4 (36%)            |
| Immunosuppressants                  | –                  | 11 (55%)                                | 1 (9%)             | 4 (20%)                   | 1 (9%)             |
| Anti-TNF                            | –                  | –                                       | 1 (9%)             | –                         | 3 (27%)            |
|                                     |                    | <b>Smoking status</b>                   |                    |                           |                    |
| Non-smoker, n (%)                   | 1 (14%)            | 12 (60%)                                | 6 (54%)            | 15 (75%)                  | 9 (81%)            |
| Active smoker, n (%)                | 3 (43%)            | 6 (30%)                                 | 5 (46%)            | 1 (5%)                    | 1 (9.5%)           |
| unknown                             | 3 (43%)            | 2 (10%)                                 | 0                  | 4 (20%)                   | 1(9.5%)            |

223

224

225

226

227

228

229 **Supplementary Table 4.**

230 Characteristics of healthy patients and patients with IBD of the Basler IBD cohort, biopsy

231 donors from healthy, inflamed, and non-inflamed regions for immunofluorescence staining.

232

|                                           | <i>Healthy</i> |          |        |        |        | <i>Ulcerative colitis</i> |                |                                                             | <i>Crohn's disease</i> |                               |                 |
|-------------------------------------------|----------------|----------|--------|--------|--------|---------------------------|----------------|-------------------------------------------------------------|------------------------|-------------------------------|-----------------|
| <b>Sample #</b>                           | 5266           | 5268     | 5269   | 5270   | 5272   | 504                       | 535            | 619                                                         | 558                    | 568                           | 620             |
| <b>Gender</b>                             | male           | female   | female | male   | male   | female                    | female         | unknown                                                     | female                 | male                          | female          |
| <b>Age</b>                                | 61             | 30       | 61     | 42     | 58     | 50                        | 71             | unknown                                                     | 72                     | 68                            | 69              |
| <b>BMI</b>                                | 20,1           | un-known | 23,5   | 31,7   | 30,6   | 25,6                      | 27,3           | unknown                                                     | 19                     | 32                            | 21,6            |
| <b>Age at diagnosis</b>                   | –              |          |        |        |        | 34                        | 56             | unknown                                                     | 23                     | 52                            | 56              |
| <b>Smoking status</b>                     | un-known       | un-known | Yes    | former | former | un-known                  | un-known       | unknown                                                     | non-smoker             | active                        | active          |
| <b>Localisation inflamed</b>              | –              |          |        |        |        | sigmoid/rectum            | rectum/sigmoid | sigmoid/rectum                                              | unknown                | sigmoid                       | terminal Ileum  |
| <b>Localisation non-inflamed</b>          | –              |          |        |        |        | transversal colon         | colon          | ascending/transversal colon                                 | rectum                 | colon descending              | colon ascending |
| <b>Medical treatment at time of study</b> | –              |          |        |        |        | none                      | none           | none at time of study, but received Salofalk 10 days before | Quantalan, Immodium    | Spiricort, Aldactone, Orfiril | unknown         |
| <b>Clinical disease activity index</b>    | –              |          |        |        |        | 5                         | 6              | unknown                                                     | unknown                | 74                            | 70              |

233 *Note: age calculated as of 2019 (healthy) and 2018 (IBD patient), not the year of sample*

234

235

236

237

238

239

240

241

242 **Supplementary Table 5.**

243 Primers used for qPCR in this study.

| <b>Primer (mouse)</b> | <b>Sequence (5'-3')</b>           | <b>Tm (°C)</b> | <b>Product size (bp)</b> |
|-----------------------|-----------------------------------|----------------|--------------------------|
| <i>Actβ</i> -fwd      | TTC TTT GCA GCT CCT TCG TT        | 56,4           | 149                      |
| <i>Actβ</i> -rev      | ATG GAG GGG AAT ACA GCC C         | 59,5           |                          |
| <i>Il1β</i> -fwd      | TGT GAA ATG CCA CCT TTT GA        | 54,3           | 94                       |
| <i>Il1β</i> -rev      | GGT CAA AGG TTT GGA AGC AG        | 58,4           |                          |
| <i>Il6</i> -fwd       | TCG GAG GCT TAA TTA CAC ATG TTC T | 62,5           | 94                       |
| <i>Il6</i> -rev       | GCA TCA TCG TTG TTC ATA CAA TCA   | 60,3           |                          |
| <i>Mcp-1</i> -fwd     | AGG TCC CTG TCA TGC TTC TG        | 60,5           | 249                      |
| <i>Mcp-1</i> -rev     | TCT GGA CCC ATT CCT TCT TG        | 58,4           |                          |
| <i>Tnf</i> -fwd       | CCA CCA CGC TCT TCT GTC TAC       | 63,2           | 103                      |
| <i>Tnf</i> -rev       | AGG GTC TGG GCC ATA GAA CT        | 60,5           |                          |
| <i>Il-1α</i> -fwd     | CGC TTG AGT CGG CAA AGA AAT       | 59,5           | 271                      |
| <i>Il-1α</i> -rev     | CTT CCC GTT GCT TGA CGT TG        | 60,5           |                          |
| <i>iNos</i> -fwd      | GTT CTC AGC CCA ACA ATA CAA GA    | 60,9           | 127                      |
| <i>iNos</i> -rev      | GTG GAC GGG TCG ATG TCA C         | 61,6           |                          |
| <i>Kc</i> -fwd        | CTG GGA TTC ACC TCA AGA ACA TC    | 62,9           | 117                      |
| <i>Kc</i> -rev        | CAG GGT CAA GGC AAG CCT C         | 61,6           |                          |
| <b>Primer (human)</b> | <b>Sequence (5'-3')</b>           | <b>Tm (°C)</b> | <b>Product size (bp)</b> |
| <i>GAPDH</i> -fwd     | TCG ACA GTC AGC CGC ATC TTC TTT   | 65,2           | 104                      |
| <i>GAPDH</i> -rev     | GCC CAA TAC GAC CAA ATC CGT TGA   | 65,2           |                          |
| <i>SLC3A2</i> -fwd    | GAC CCC TGT TTT CAG CTA CG        | 60,5           | 108                      |
| <i>SLC3A2</i> -rev    | TCA GGG AAG CTG GAC TCA TC        | 60,5           |                          |
| <i>SLC7A5</i> -fwd    | TCC TGG ATC ATC CCC GTC TT        | 60,5           | 88                       |
| <i>SLC7A5</i> -rev    | CCA CGA AGA AGA GCC TGG AG        | 62,5           |                          |

244

245
