# Supplementary material for: Loss of the branched-chain amino acid transporter CD98hc alters the development of colonic macrophages in mice
Source: PubMed Central journal article supplement (PMC7080761; doi:10.1038/s42003-020-0842-3), 2020-03-18
Supplement: 42003_2020_842_MOESM2_ESM.pdf [file 42003_2020_842_MOESM2_ESM.pdf]

## **Description of additional supplementary items**

### **Supplementary Data 1 (10× genomics web summaries)**

Diagnostic plots for the 10× genomics sequencing of WT and cKO cells.

### **Supplementary Data 2**

Reference datasets retrieved from ImmGen used to identify the cell types per cluster.

### **Supplementary Data 3 (Plotly Visualization)**

3D-visualization of the scRNA-seq principle component analysis.

### **Supplementary Data 4**

Differentially expressed genes in CD98hc cKO cells over control cells for each cluster of the scRNA-seq data.

### **Supplementary Data 5**

Source data underlying the graphs in figures and supplementary material as a n excel file.
